# Supplementary material
Source: PubMed Central journal article supplement (PMC9481734)
Supplement: NIHMS1829584-supplement-2.pdf [file NIHMS1829584-supplement-2.pdf]

**Fig. S1, related to Fig. 1**

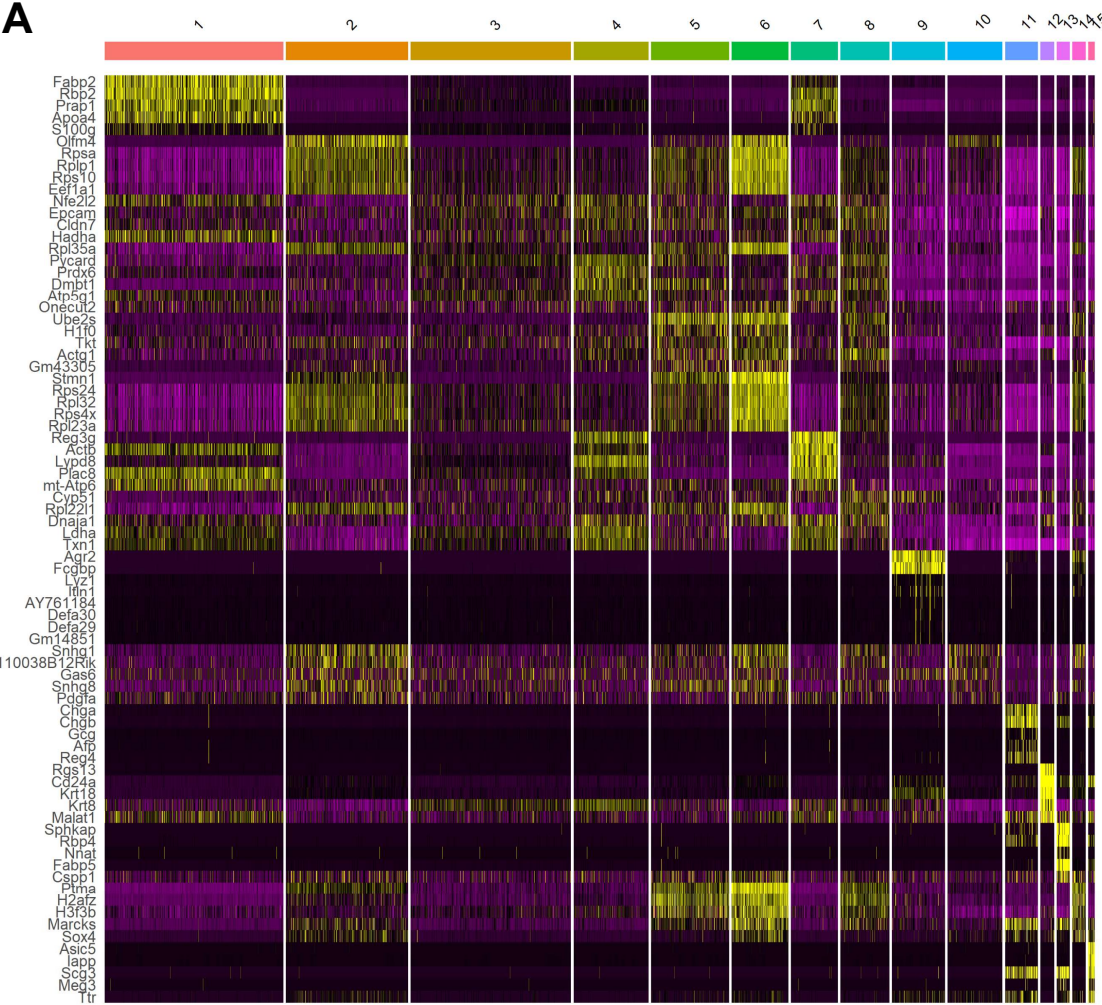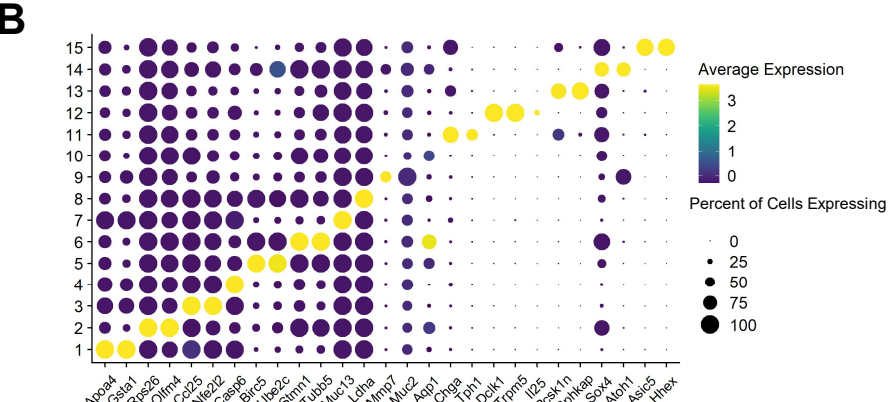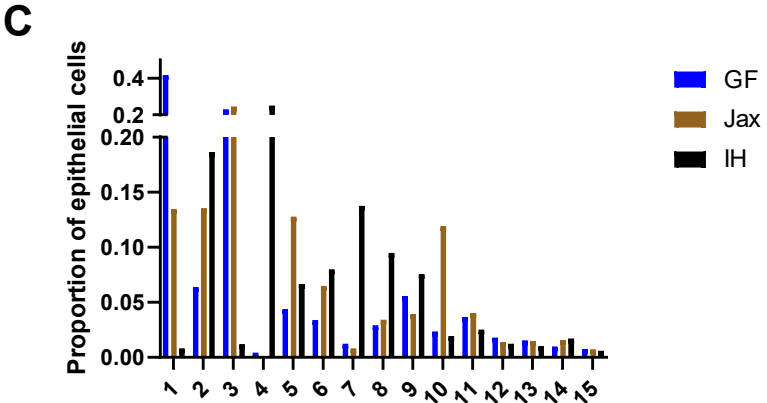

**Epithelial scRNAseq cluster annotation. (A)** Heatmap of top DEGs between clusters and **(B)** selected DEGs used for cluster annotation. **(C)** Proportion of epithelial cells in each cluster across different microbiota conditions.

**Fig. S2, related to Fig. 1**

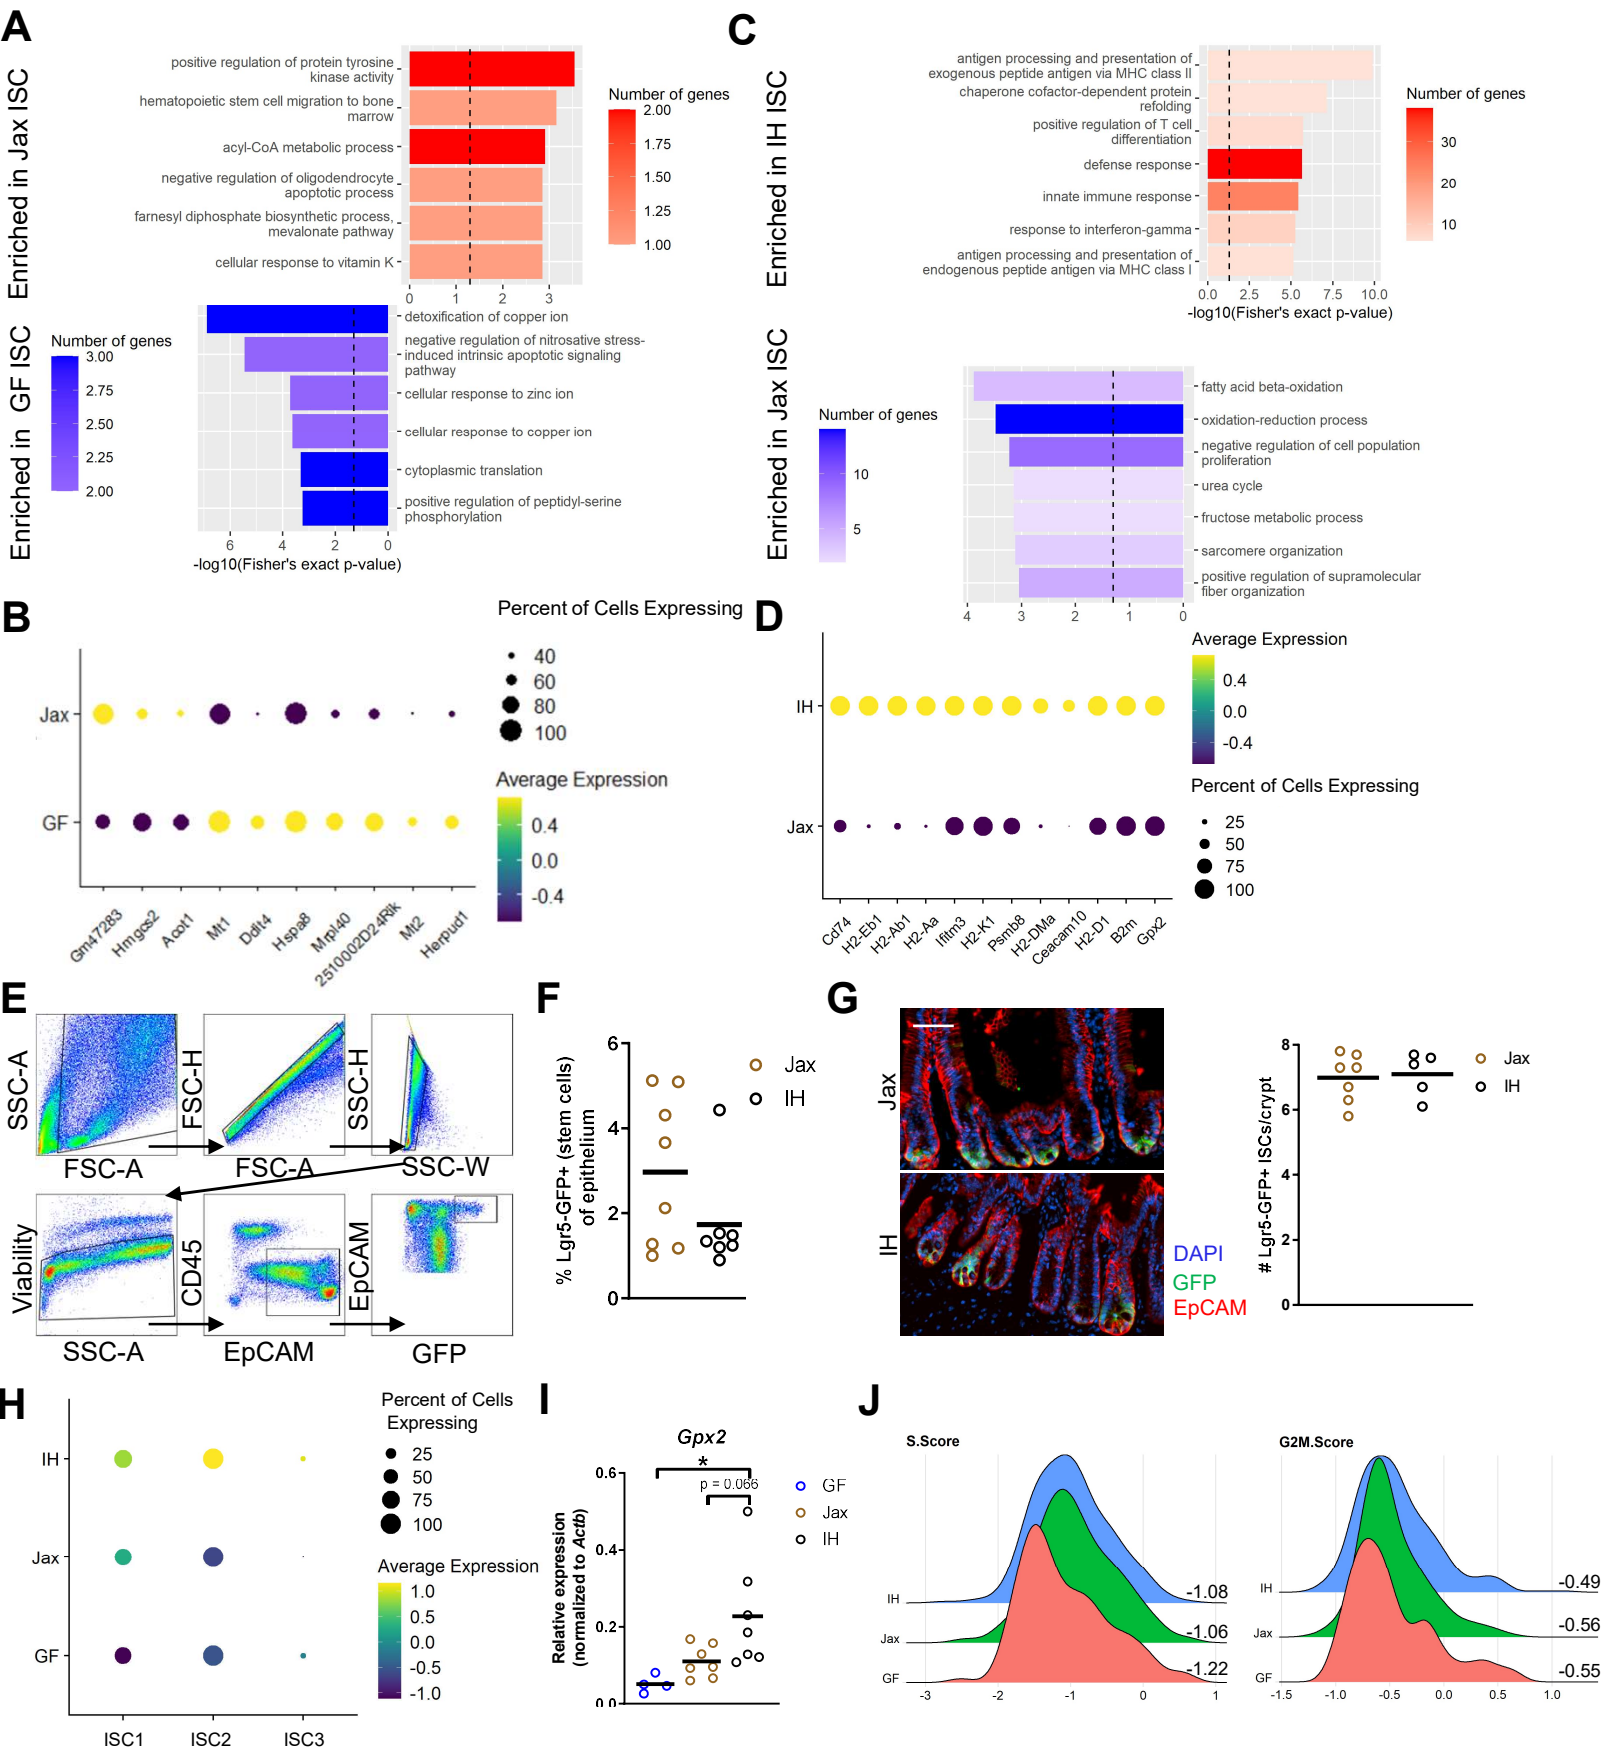

**Fig. S3, related to Fig. 2**

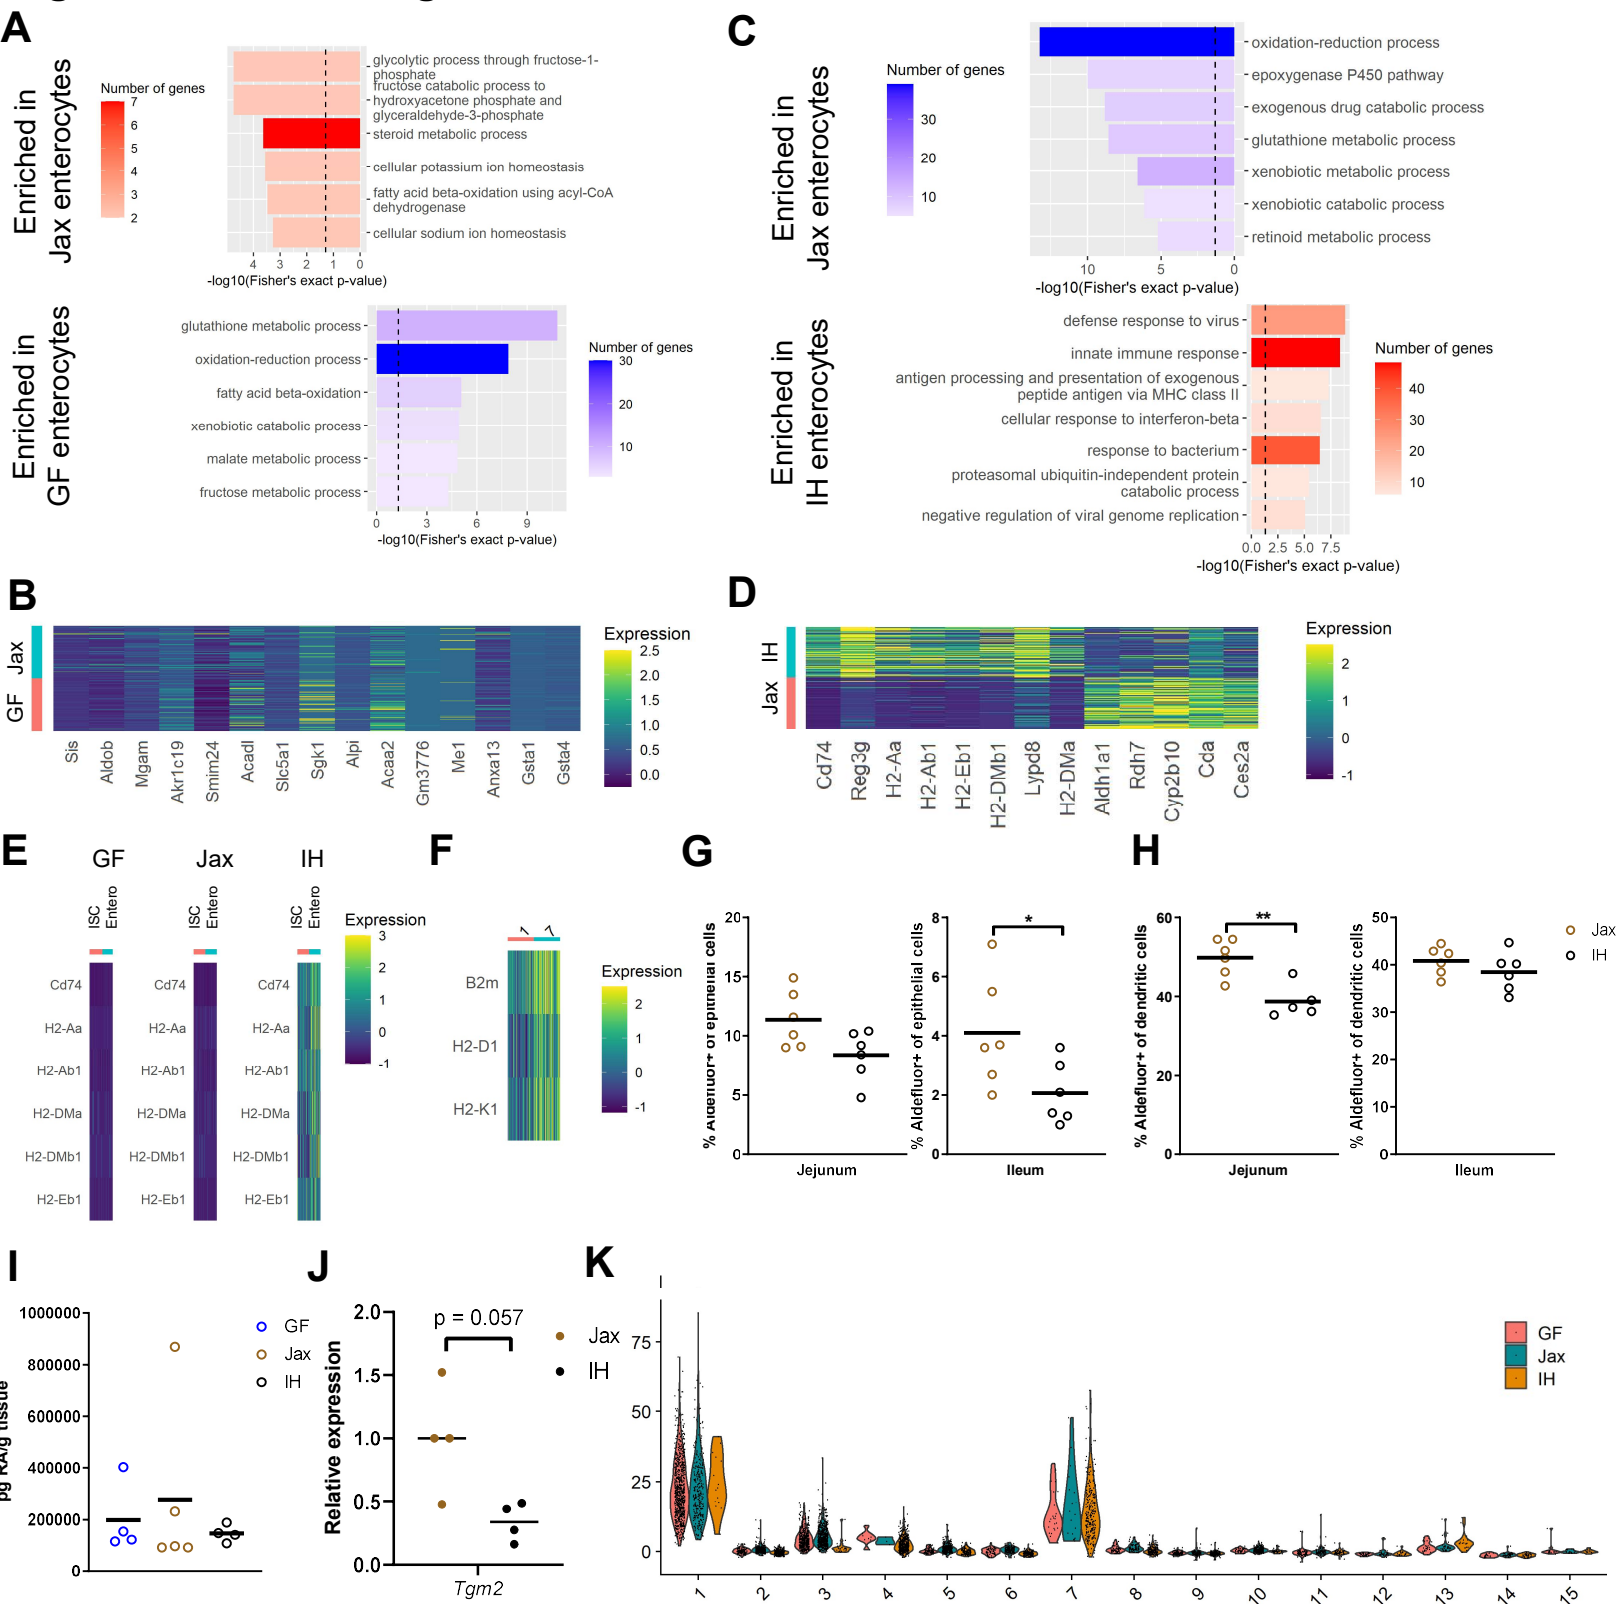

**Microbiota regulation of enterocyte RA production and signaling.** (A) GO categories for DEGs enriched in Jax vs GF enterocytes (dashed line indicates p value = 0.05). (B) Top DEGs in Jax vs GF enterocytes, ranked by significance. (C) GO categories for DEGs enriched in Jax vs IH enterocytes (dashed line indicates p value = 0.05). (D) Top DEGs in Jax vs IH enterocytes, ranked by significance. (E) Comparison of MHCII gene expression in ISCs vs enterocytes. (F) Heatmap of MHCII genes in GF/Jax (cluster 1) and IH (cluster 7) enterocytes. (G-H) Measurement of Aldh enzyme activity via Aldefluor assay in epithelial cells (EpCAM<sup>+</sup>CD45<sup>-</sup>) or dendritic cells (CD45<sup>+</sup>CD11c<sup>+</sup>MHCII<sup>+</sup>CD64<sup>-</sup>). Gating strategy as in Fig. S2E and Fig. S4A. (I) RA measurement in duodenum by LC-MS. (J) mRNA expression of RA target gene *Tgm2* in sorted intestinal eosinophils. (K) Retinoic acid target gene expression in different cell type clusters. Each symbol (G-J) represents data from an individual mouse. Data reflect 2-3 independent experiments. Data are shown as mean with individual data points or SEM. \*p < 0.05, \*\*p < 0.01 Mann-Whitney U test.

**Fig. S4, related to Fig. 3**

**A**

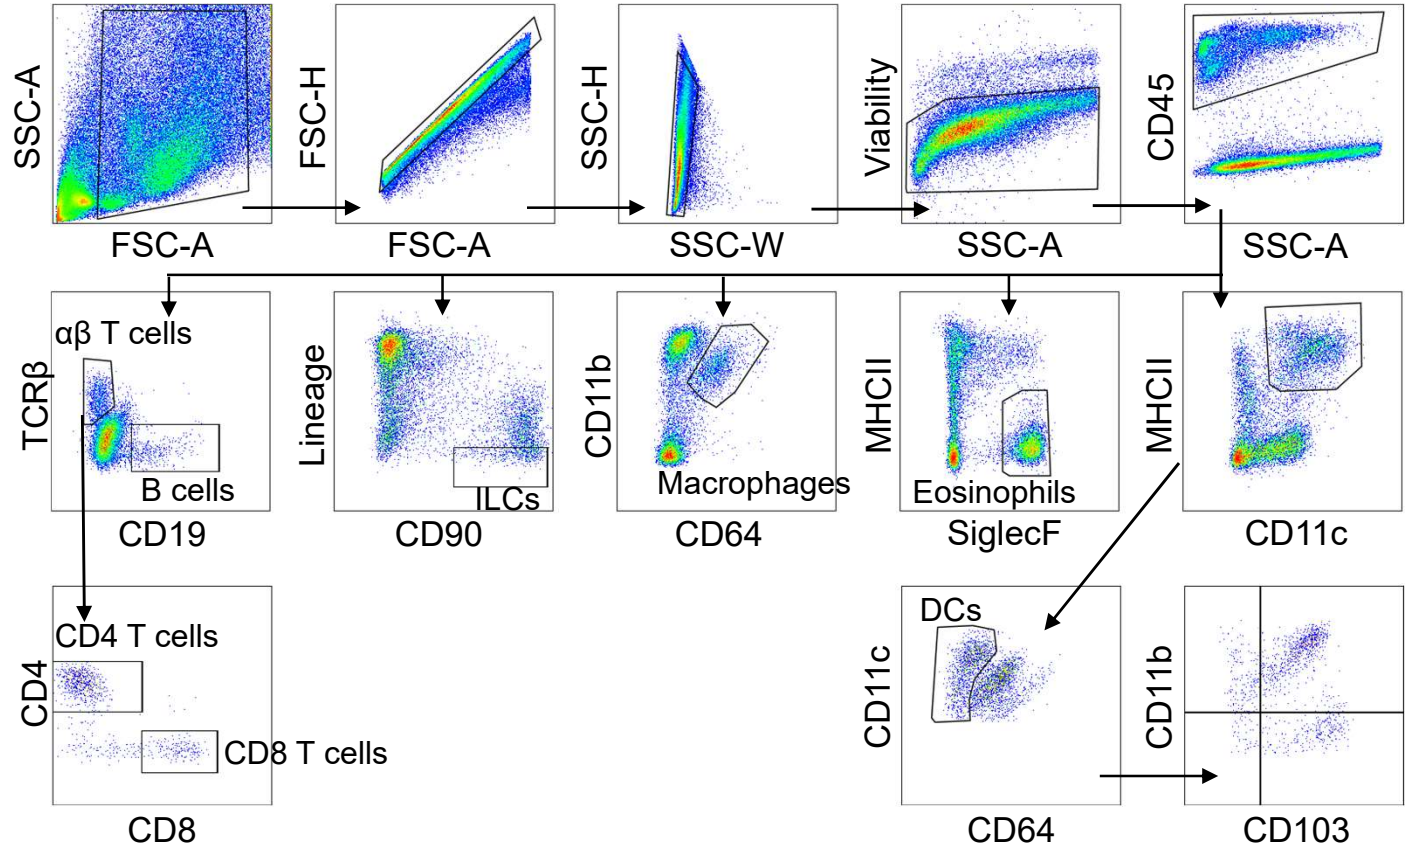

**B**

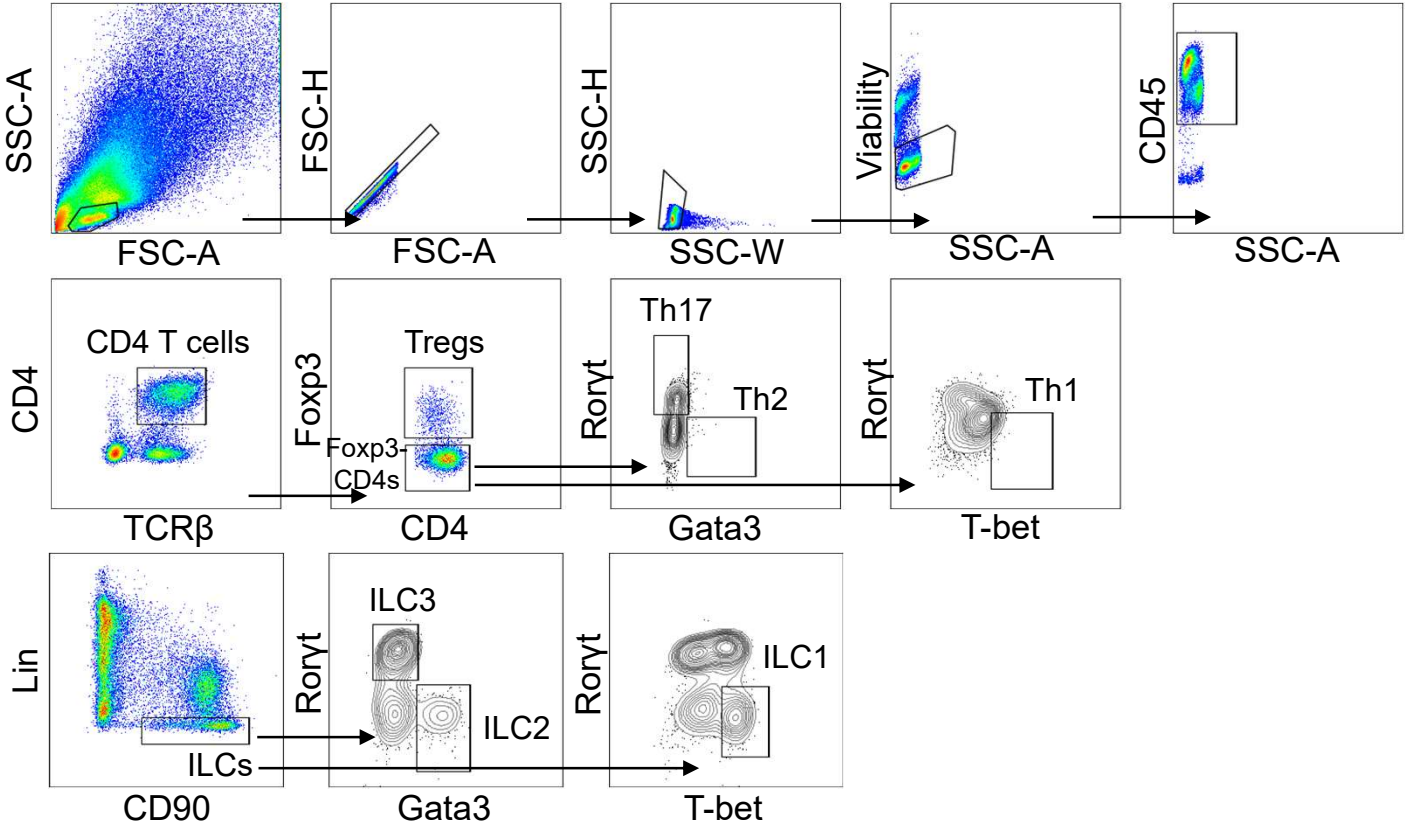

**Lamina propria immune cell flow cytometry gating strategies. (A) Total immune cell populations. (B) CD4 T cell and ILC subsets.**

**Fig. S5, related to Fig. 3**

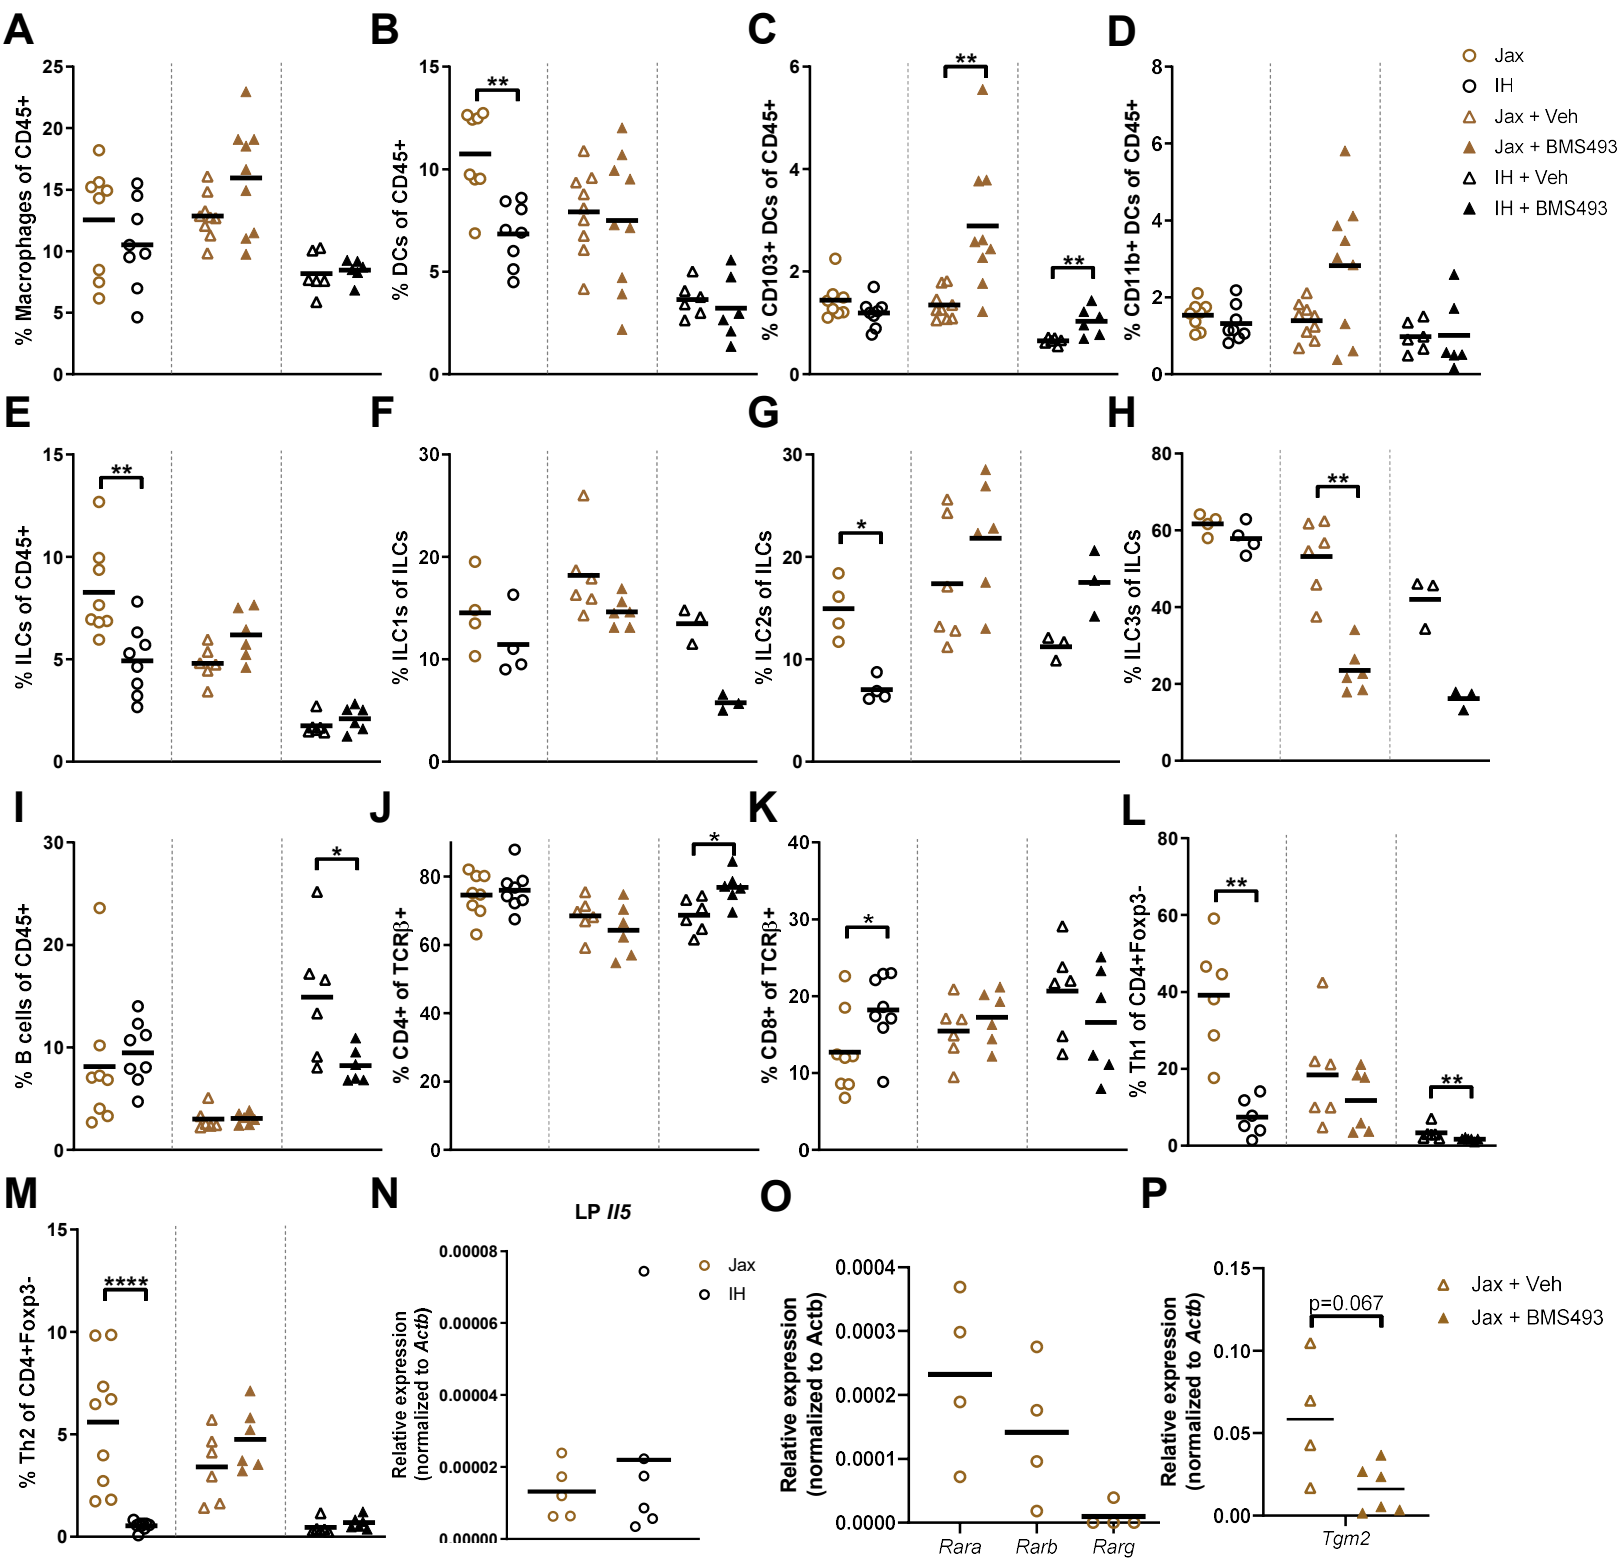

**Immune cell characterization after RAR inhibition. (A-M)** Flow cytometry of lamina propria immune populations at steady state, or after treatment with 220μg RAR inhibitor BMS493 or vehicle (DMSO) for 8 days. **(N)** Lamina propria *IIS* mRNA expression. **(O)** Retinoic acid receptor expression in sorted intestinal eosinophils from Jax mice. **(P)** Expression of RA target gene *Tgm2* in sorted intestinal eosinophils from mice treated for 8 days with BMS493 or vehicle (DMSO). Each symbol represents data from an individual mouse (A-N) or multiple mice pooled for sorting (N-O). Data reflect at least 2 independent experiments or are pooled from 2-3 experiments (K-M). Data are shown as mean with individual data points. \*p < 0.05, \*\*p < 0.01, \*\*\*\*p < 0.0001, Mann-Whitney U test.

**Fig. S6, related to Figs. 5 and 6**

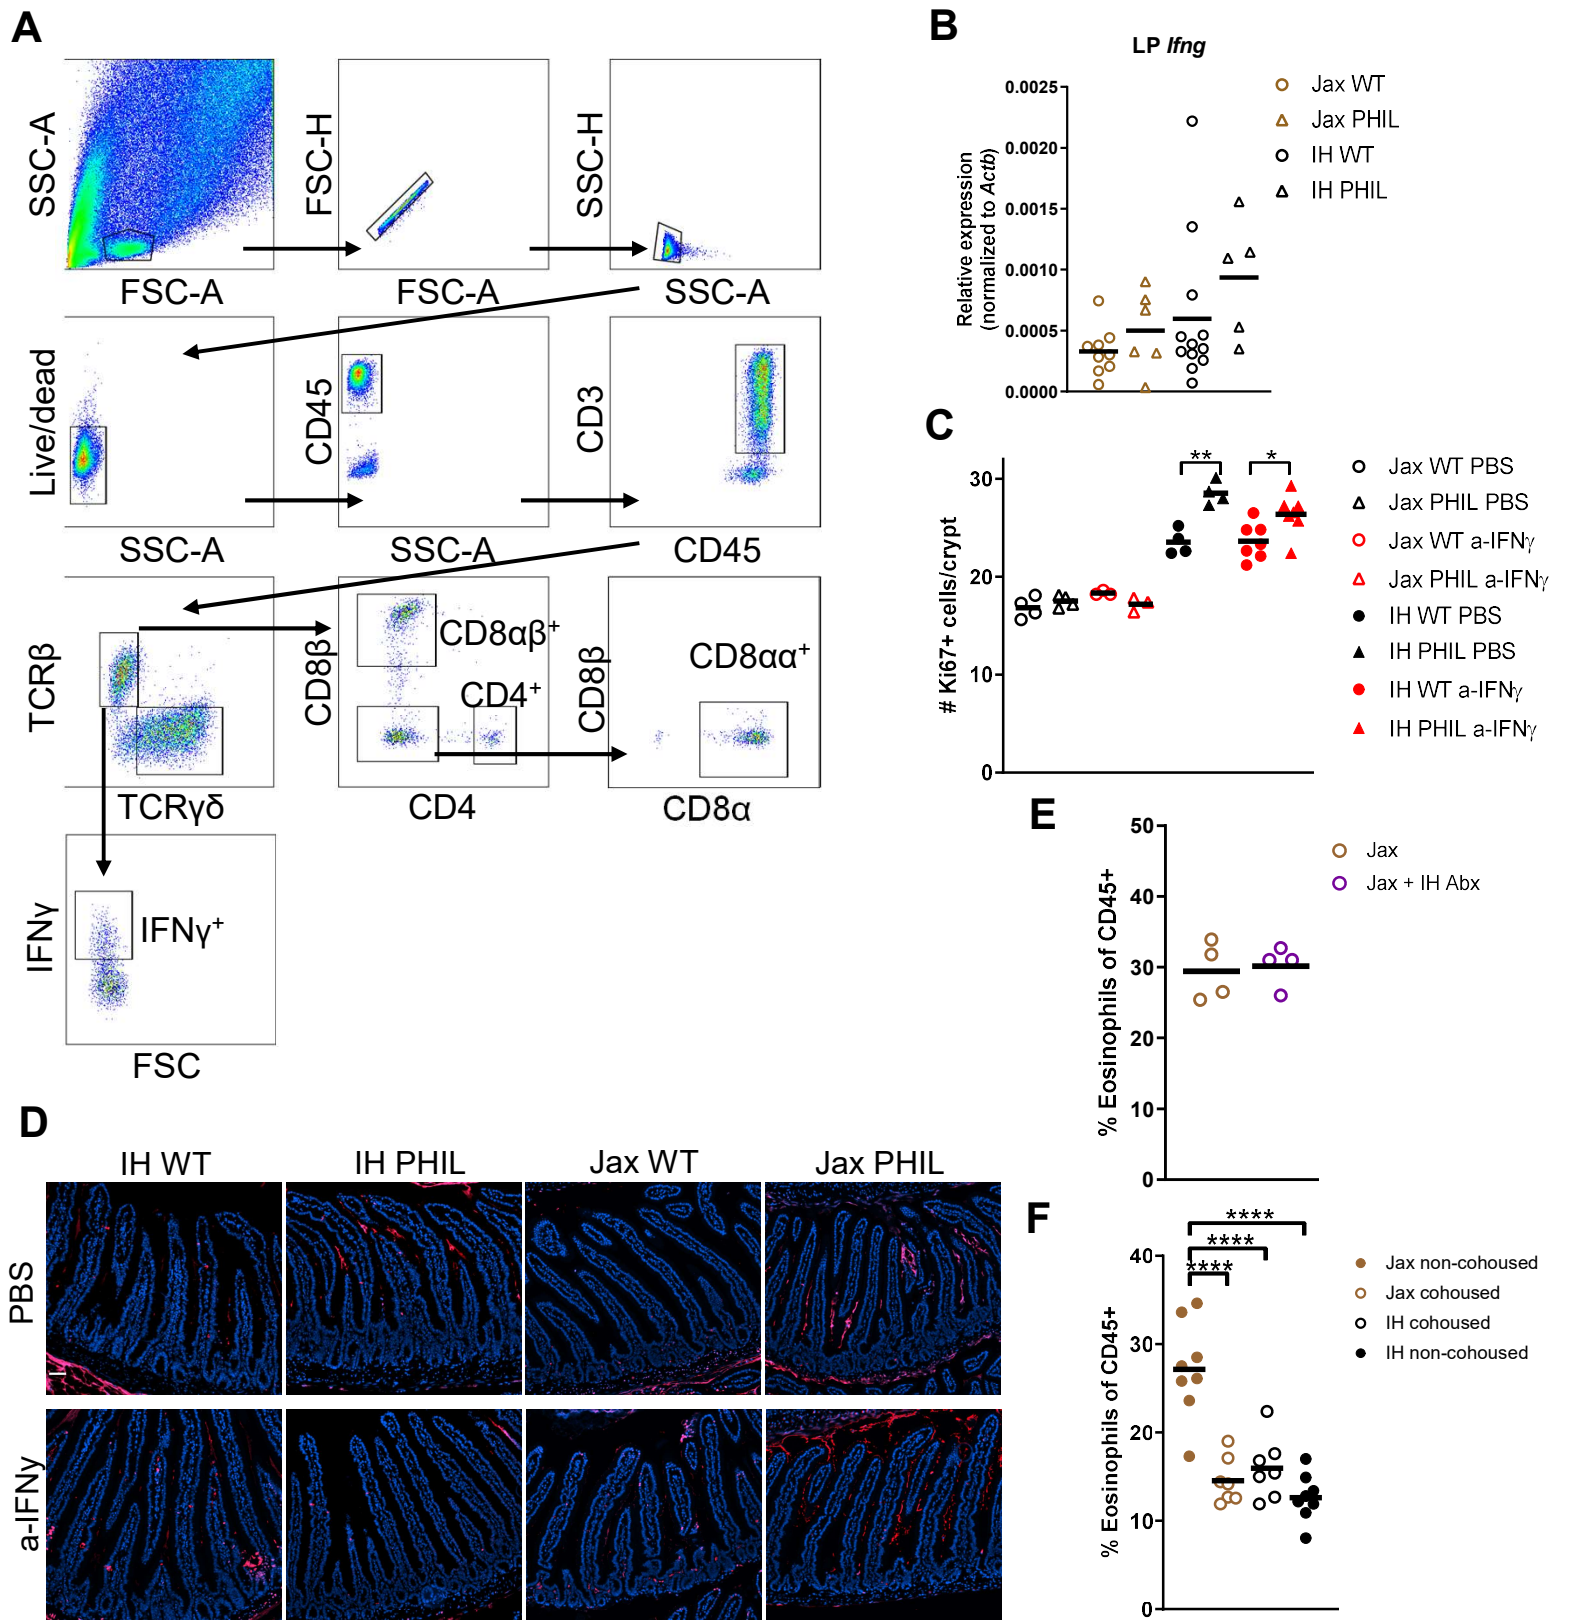

**IEL IFN- $\gamma$  regulates epithelial proliferation.** (A) Flow cytometry gating strategy for IEL populations. (B) mRNA expression of *Ifng*. (C) Ki67+ cells assessed by microscopy and (D) TUNEL staining after 8 days of treatment with PBS or 200 $\mu$ g a-IFN- $\gamma$ . (E) Jax mice received transfer of microbiota from IH mice that were pre-treated for 2 weeks with broad-spectrum antibiotics (vancomycin, metronidazole, ampicillin, neomycin, and amphotericin B) and eosinophils were assessed by flow cytometry. (F) Jax and IH mice were either co-housed in the same cage or housed only with mice with the same microbiota for 2 weeks. Each symbol (B, C, E, F) represents an individual mouse. Data are representative of 2 independent experiments. \* $p < 0.05$ , \*\* $p < 0.01$ , \*\*\*\* $p < 0.0001$ , one-way ANOVA (F) or two-way ANOVA (C) with Holm-Sidak's post-test.

**Fig. S7, related to Fig. 7**

**A**

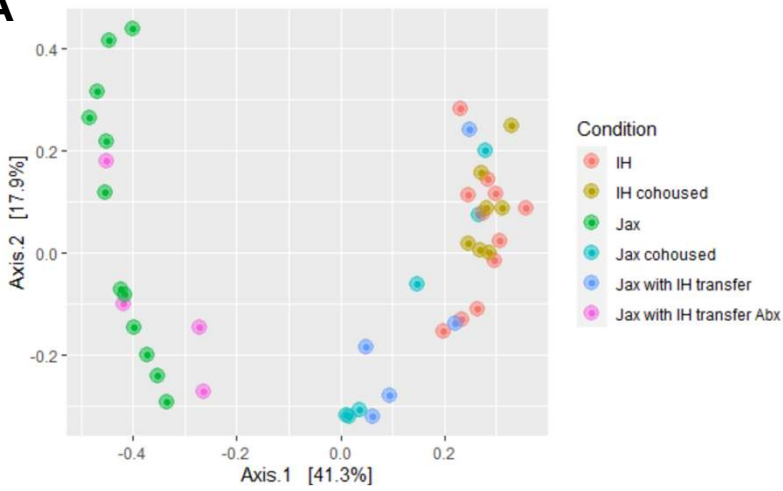

**B**

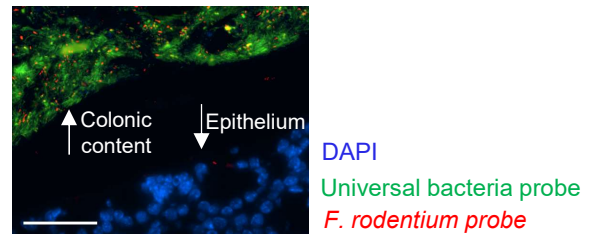

**C**

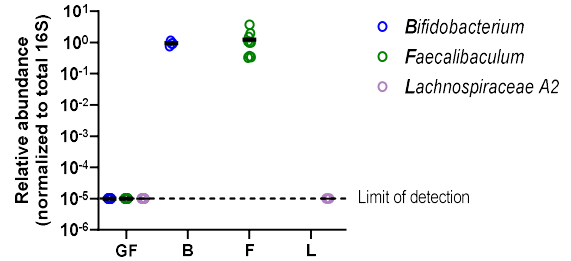

**D**

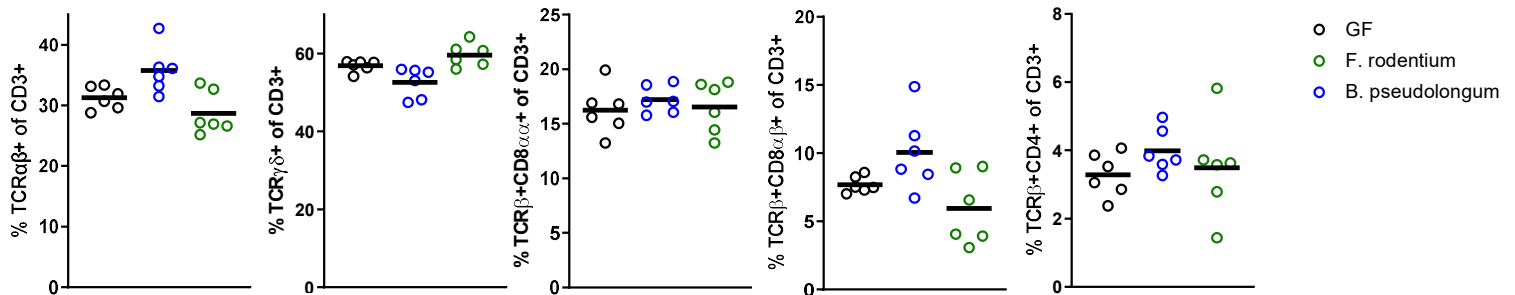

**E**

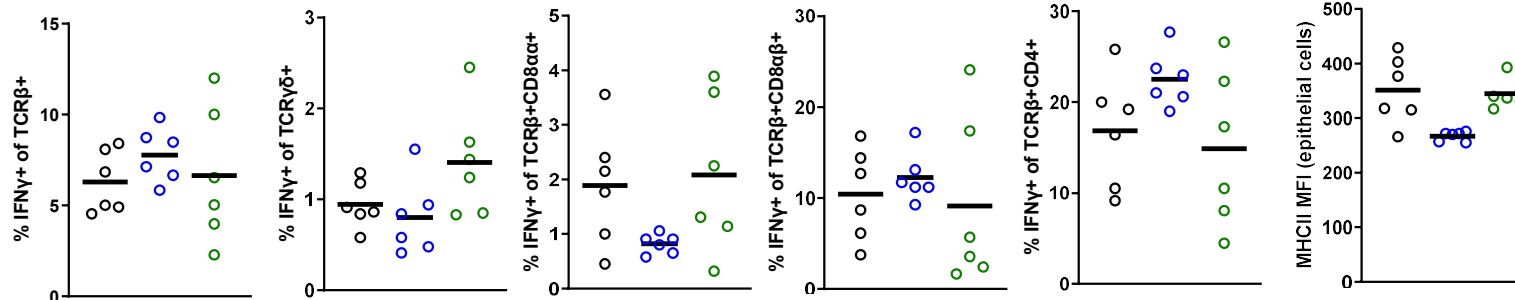

**F**

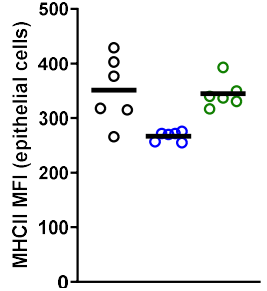

**G**

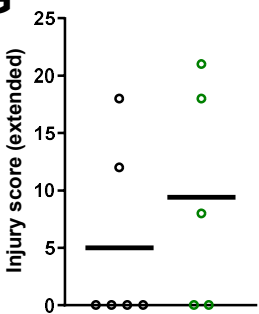

***F. rodentium* and *B. pseudolongum* do not regulate IFN- $\gamma$  production and MHCII expression. (A)** Principal coordinates analysis of Bray-Curtis dissimilarity of stool 16S rRNA gene amplicon sequencing. **(B)** 16S FISH on colonic tissue and contents from IH mice. **(C)** Colonization levels in stool of mono-colonized mice determined by qPCR. **(D)** Flow cytometric profiling of IEL populations, **(E)** IFN- $\gamma$  production by IEL populations, **(F)** epithelial MHCII expression, and **(G)** duodenum histological injury score 3 days after anti-CD3 injection, after 2 weeks of colonization. Each symbol (C-G) represents data from an individual mouse. Data are representative of 2 independent experiments.

**Table S2. Primers used in this study, related to STAR Methods.**

|                              |    |                            |
|------------------------------|----|----------------------------|
| <i>Actin</i>                 | Fw | TACCACCATGTACCCAGGCA       |
|                              | Rv | CTCAGGAGGAGCAATGATCTTGAT   |
| <i>Adh1</i>                  | Fw | GCAAAGCTGCGGTGCTATG        |
|                              | Rv | TCACACAAGTCACCCCTTCTC      |
| <i>Aldh1a1</i>               | Fw | ATACTTGTCGGATTTAGGAGGCT    |
|                              | Rv | GGGCCTATCTTCAAATGAACA      |
| <i>Gpx2</i>                  | Fw | GCCTCAAGTATGTCCGACCTG      |
|                              | Rv | GGAGAACGGGTCATCATAAGGG     |
| <i>Ifng</i>                  | Fw | ATGAACGCTACACACTGCATC      |
|                              | Rv | CCATCCTTTTGCCAGTTCCTC      |
| <i>Il5</i>                   | Fw | CTCTGTTGACAAGCAATGAGACG    |
|                              | Rv | TCTTCAGTATGTCTAGCCCCTG     |
| <i>Rara</i>                  | Fw | TTCTTTCCCCCTATGCTGGGT      |
|                              | Rv | GGGAGGGCTGGGTACTATCTC      |
| <i>Rarb</i>                  | Fw | CTGCTCAATCCATCGAGACAC      |
|                              | Rv | CTTGTCCTGGCAAACGAAGC       |
| <i>Rarg</i>                  | Fw | GGAGCAGGCTTCCCATTTCG       |
|                              | Rv | CATGGCTTATAGACCCGAGGA      |
| <i>Rdh7</i>                  | Fw | GTGTCTTTGTGTGGTGGTGGTTAC   |
|                              | Rv | CCACAGCTTCTCTATGCTGTGTGA   |
| <i>Tgm2</i>                  | Fw | GACAATGTGGAGGAGGGATCT      |
|                              | Rv | CTCTAGGCTGAGACGGTACAG      |
|                              |    |                            |
| 16S universal                | Fw | TCCTACGGGAGGCAGCAGT        |
|                              | Rv | GGACTACCAGGGTATCTAATCCTGTT |
| <i>Bifidobacterium</i> genus | Fw | CTCCTGGAAACGGGTGG          |
|                              | Rv | GGTGTCTTCCCGATATCTACA      |
| <i>F. rodentium</i>          | Fw | CCGGGAATACGCTCTGGAAA       |
|                              | Rv | GCCAACCAACTAATGCACCG       |
| <i>Lachnospiraceae</i> A2    | Fw | GCCGGCAGCATATGCAACG        |
|                              | Rv | TTTACCTGCTGGCTACTGAGGG     |
